# Supplementary material
Source: Springer Nature journal article supplement (https://www.springermedizin.de/resource/supplementary/13098_2014_353_MOESM2_ESM.pdf/9671146)

DNA Ladder N D D+Res DIR DIR+Res

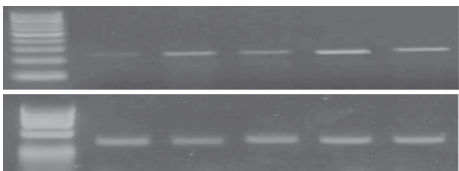

COX-2

$\beta$ -actin

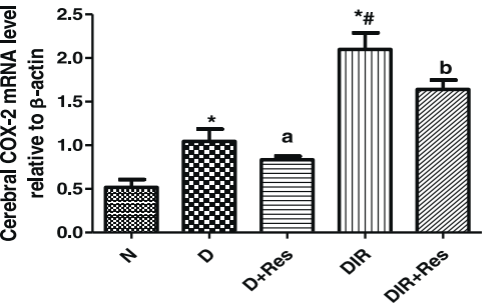

Supplement: MOESM2 [file 9671146]
